# Supplementary material for: The Association between Absence of Abdominal Pain and Mortality in Lower Intestinal Perforation in Patients with Autoimmune Rheumatic Diseases
Source: Hindawi journal article supplement (doi:10.1155/2019/5381453), 2019-02-17
Supplement: f1 [file 5381453.f1.pdf]

1 Supplemental table 1. The comparison of patient characteristics between the patients with and without rheumatic disease.

|                                                         |                                             | Autoimmune        |                    | <i>P</i> value |
|---------------------------------------------------------|---------------------------------------------|-------------------|--------------------|----------------|
|                                                         |                                             | rheumatic disease | Control group      |                |
|                                                         |                                             | group             | group              |                |
|                                                         |                                             | <i>n</i> = 31     | <i>n</i> = 58      |                |
| Age, years, median (IQR)                                |                                             | 61 (47–71)        | 69.5 (56–78)       | 0.08           |
| Sex, female (%)                                         |                                             | 22 (71)           | 25 (43)            | 0.02*          |
| Body weight, kg, median (IQR)                           |                                             | 46 (38–56)        | 56 (47–62)         | 0.008**        |
| History of abdominal surgery, <i>n</i> (%)              |                                             | 7 (23)            | 17 (29)            | 0.62           |
| Interstitial lung disease, <i>n</i> (%)                 |                                             | 7 (23)            | 0 (0)              | <0.001**       |
| Chronic kidney disease, <i>n</i> (%)                    |                                             | 12 (39)           | 12 (21)            | 0.08           |
| Diabetes mellitus, <i>n</i> (%)                         |                                             | 10 (32)           | 10 (17)            | 0.11           |
| Dosage of PSL at diagnosis of CTD, mg/day, median (IQR) |                                             | 30 (10–40)        | 0 (0–0)            | <0.001**       |
| Dosage of PSL at perforation, mg/day, median (IQR)      |                                             | 19.5 (10.8–40)    | 0 (0–0)            | <0.001**       |
| Immunosuppressive agents at perforation, <i>n</i> (%)   |                                             | 14 (45)           | 1 (2)              | <0.001**       |
| NSAIDs at the time of perforation, <i>n</i> (%)         |                                             | 4 (13)            | 4 (7)              | 0.43           |
| Absence of abdominal pain at perforation, <i>n</i> (%)  |                                             | 26 (84)           | 57 (98)            | 0.02*          |
| White blood cell count, / $\mu$ l, median (IQR)         |                                             | 9600 (6600–14000) | 8300 (4700–12875)  | 0.36           |
| Lymphocyte count, / $\mu$ l, median (IQR)               |                                             | 445 (264–938)     | 590 (431–1118)     | 0.08           |
| Haemoglobin, g/dL, median (IQR)                         |                                             | 9.7 (8.5–11.7)    | 12.3 (10.5–14.6)   | <0.001**       |
| Albumin, g/dL, median (IQR)                             |                                             | 2.5 (2.2–3.0)     | 2.85 (2.3–3.6)     | 0.19           |
| Lactate dehydrogenase, IU/L, median (IQR)               |                                             | 234 (176–397)     | 196 (166.25–274.5) | 0.07           |
| Blood urea nitrogen, mg/dL, median (IQR)                |                                             | 20 (14–39)        | 20 (14–37.25)      | 0.86           |
| Serum creatinine, mg/dL, median (IQR)                   |                                             | 0.74 (0.41–1.46)  | 0.835 (0.64–1.7)   | 0.12           |
| Amylase, IU/L, median (IQR)                             |                                             | 89 (61–296)       | 57 (41–96)         | 0.006**        |
| Plasma sodium, mmol/L, median (IQR)                     |                                             | 136 (131–140)     | 138 (135–141)      | 0.13           |
| Plasma potassium, mmol/L, median (IQR)                  |                                             | 3.9 (3.5–4.5)     | 4.05 (3.65–4.525)  | 0.84           |
| CRP, mg/dL, median (IQR)                                |                                             | 7.4 (3.4–21.1)    | 15.25 (3.9–21.1)   | 0.71           |
| IgG, g/dL, median (IQR)                                 |                                             | 951 (680–1297)    | N/A                | N/A            |
| Cause of perforation                                    | Diverticulitis, <i>n</i> (%)                | 14 (45)           | 22 (38)            | 0.65           |
|                                                         | Autoimmune rheumatic diseases, <i>n</i> (%) | 4 (13)            | 1 (2)              | 0.048*         |
|                                                         | Malignancy, <i>n</i> (%)                    | 3 (10)            | 14 (24)            | 0.16           |
|                                                         | Ischemia, <i>n</i> (%)                      | 0 (0)             | 6 (10)             | 0.09           |
|                                                         | Unknown, <i>n</i> (%)                       | 10 (32)           | 15 (26)            | 0.62           |
| Perforation location                                    | Ileum, <i>n</i> (%)                         | 5 (16)            | 8 (14)             | 0.76           |
|                                                         | Appendix, <i>n</i> (%)                      | 3 (10)            | 5 (9)              | 1.00           |

|            |                                                           |                  |                  |          |
|------------|-----------------------------------------------------------|------------------|------------------|----------|
|            | Colon, <i>n</i> (%)                                       | 22 (71)          | 40 (69)          | 1.00     |
|            | Rectum, <i>n</i> (%)                                      | 3 (10)           | 4 (7)            | 0.69     |
|            | Elective operation, <i>n</i> (%)                          | 1 (3)            | 1 (2)            | 1.00     |
|            | Emergent operations, <i>n</i> (%)                         | 30 (97)          | 57 (98)          | 1.00     |
| Operations | Colostomy, <i>n</i> (%)                                   | 12 (39)          | 14 (24)          | 0.22     |
|            | Hartmann's operation, <i>n</i> (%)                        | 12 (39)          | 20 (34)          | 0.82     |
|            | Resection, <i>n</i> (%)                                   | 4 (13)           | 16 (28)          | 0.18     |
|            | Appendectomy, <i>n</i> (%)                                | 1 (3)            | 6 (10)           | 0.41     |
|            | Drainage for perforation and omental flap, <i>n</i> (%)   | 2 (6)            | 1 (2)            | 0.28     |
|            | Simple closure, <i>n</i> (%)                              | 0 (0)            | 2 (3)            | 0.54     |
|            | PMX–DHP, <i>n</i> (%)                                     | 14 (45)          | 22 (38)          | 0.65     |
|            | Methylprednisolone pulse therapy after LIPs, <i>n</i> (%) | 0 (0)            | 0 (0)            | N/A      |
|            | Dosage of GCs after LIPs, mg/day, median (IQR)            | 15 (10–40)       | 0 (0–0)          | <0.001** |
|            | Immunosuppressive agents after LIPs, <i>n</i> (%)         | 0 (0)            | 0 (0)            | N/A      |
|            | Days in ICU, median (IQR)                                 | 7 (2.8–13.8)     | 4.5 (2.8–9)      | 0.22     |
|            | Days of hospitalization, median (IQR)                     | 97 (39–140)      | 36.5 (22.8–53)   | <0.001** |
|            | Dead case, <i>n</i> (%)                                   | 11 (35)          | 4 (7)            | 0.002**  |
|            | The year of surgery, year, median (range)                 | 2009 (2002–2017) | 2013 (2010–2017) | <0.001** |

1 IQR: interquartile, PSL: prednisolone, NSAIDs: non-steroidal anti-inflammatory drugs, WBC: white blood cell, CRP: C-reactive protein, IgG: immunoglobulin G, N/A: not applicable, PMX–DHP: direct hemoperfusion with polymyxin B immobilized fiber, ICU: intensive care unit.

4 \**P* < 0.05.

5 \*\**P* < 0.01.
